# Supplementary material for: Assembly of lignin-based colloidal particles: effects of cationic surfactants, molecular weight, and solvent on morphology
Source: Royal Society of Chemistry journal article supplement (doi:10.1039/d0ra01444c), 2020-01-01
Supplement: d0ra01444c1.pdf [file d0ra01444c1.pdf]

## Electronic Supplementary Information (ESI)

### **Assembly of lignin based colloidal particles: Effect of cationic surfactants, molecular weight and solvent on the morphology**

Dexiang Liu, Jinyu Liu, Yingxiang Zhou, Jienan Chen, Peng Zhan, Guoen Yang, Zhiping

Wu\*

*School of Materials Science and Engineering, Central South University of Forestry and Technology, Changsha 410004, China. E-mail: [wuzhiping02@163.com](mailto:wuzhiping02@163.com)*

## Supplemental Figures

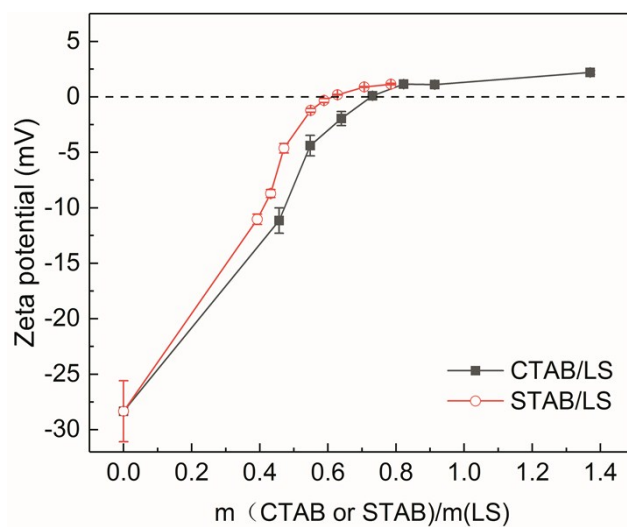

Fig. S1 Zeta potential of CTAB/LS and STAB/LS

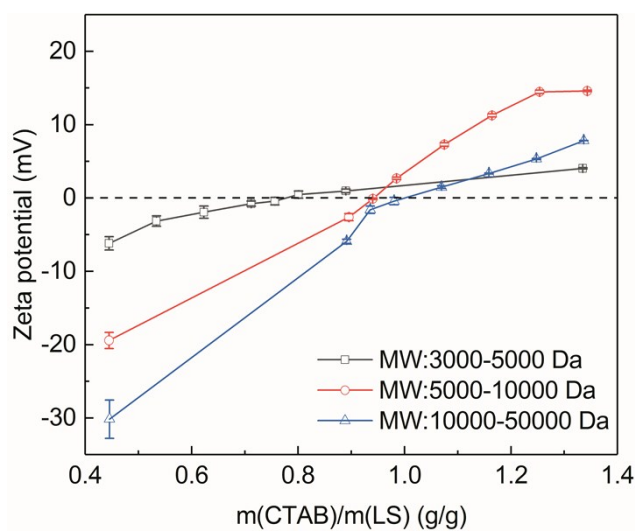

Fig. S2 Zeta potential of CTAB/LS with different molecular weight of LS

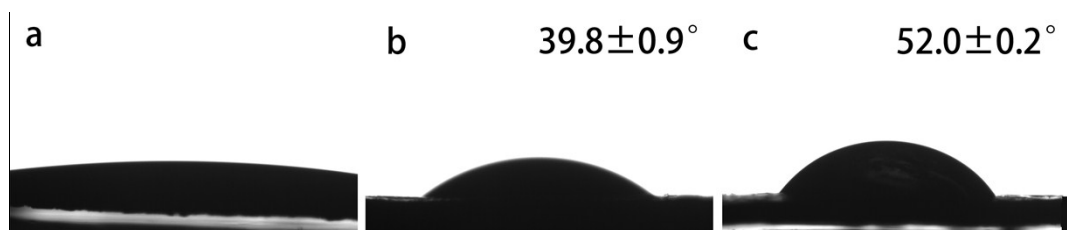

Fig. S3 The static contact angle of water droplet on the disks of LS/CTAB complexes with different molecular weight LS (a: LS/CTAB-a, b: LS/CTAB-b, c: LS/CTAB-c)
